# Supplementary material
Source: Springer Nature journal article supplement (https://www.springermedizin.de/resource/supplementary/12961_2005_18_MOESM1_ESM.pdf/9571230)
Supplement: MOESM1 [file 9571230]

**SECTOR OF HUMAN  
RESOURCE MANAGEMENT  
AND PLANNING**

**TRAINING  
SECTOR**

**HEALTH  
SECTOR**

Adequacy between intentions for initial and on-going trainings and teaching programs

Adequacy between human resource management and training and health sectors

Adequacy between skills-based profile of health professionals, health-care quality and needs and expectations from the populations

Adequacy between initial and on-going training and expected tasks by health-system professionals

Adequacy between human resource management in the field of health and health standards

Adequacy between the distribution of health-system professionals, quality of needs and expectations expressed by the populations

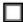

Adequacy

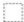

Structure

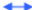

Links
